# Supplementary material for: Zwitterionicversusorganic ionic plastic crystal electrolytes with mixed anions: probing the unique physicochemical and electrolyte properties
Source: Royal Society of Chemistry journal article supplement (doi:10.1039/d1ta10024f), 2022-01-01
Supplement: d1ta10024f1.pdf [file d1ta10024f1.pdf]

## Zwitterionic versus organic ionic plastic crystal electrolytes with mixed anions: probing the unique physicochemical and electrolyte properties

Faezeh Makhlooghiyazad, Luke A. O'Dell, Jennifer M. Pringle

### Supplementary Information

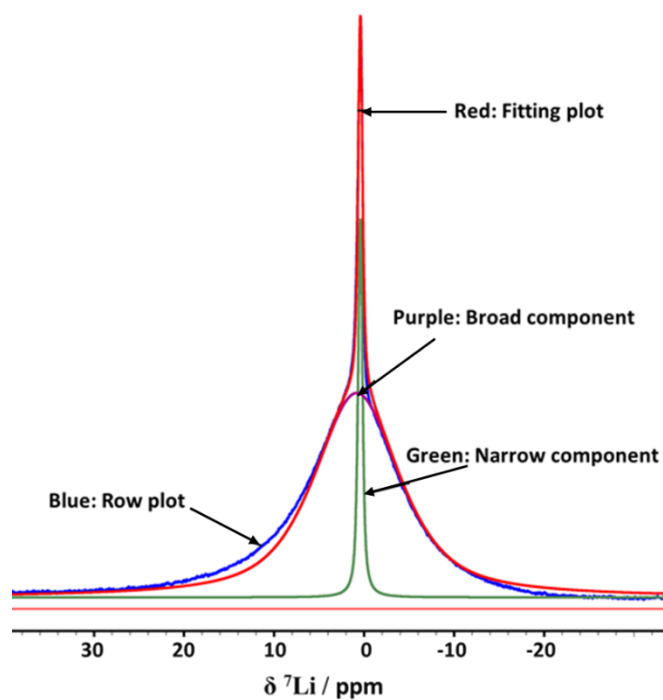

Figure S1. A fitting example of  ${}^7\text{Li}$  NMR for 90 mol%  $\text{LiBF}_4$  in ZI at 30 °C.

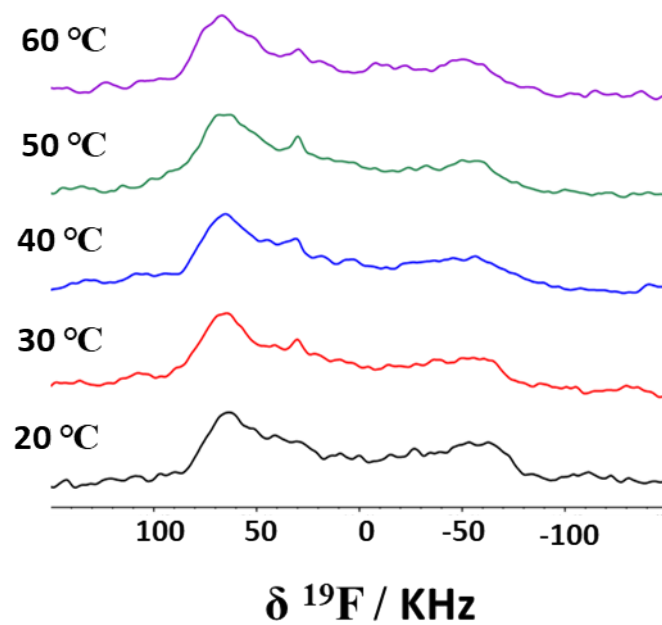

Figure S2.  $^{19}\text{F}$  single-pulse spectra versus temperature of LiFSI

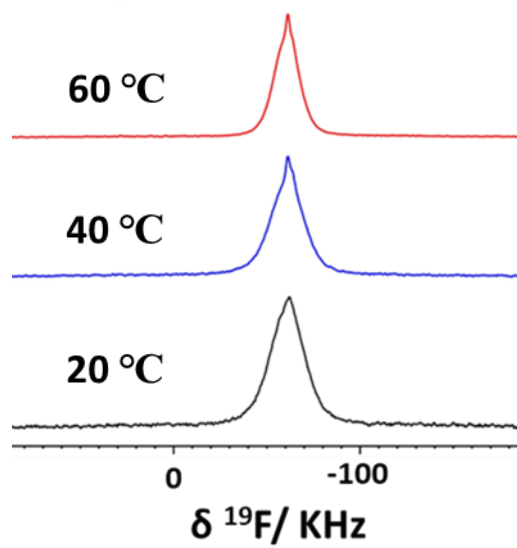

Figure S3.  $^{19}\text{F}$  single-pulse spectra versus temperature of the neat ZI

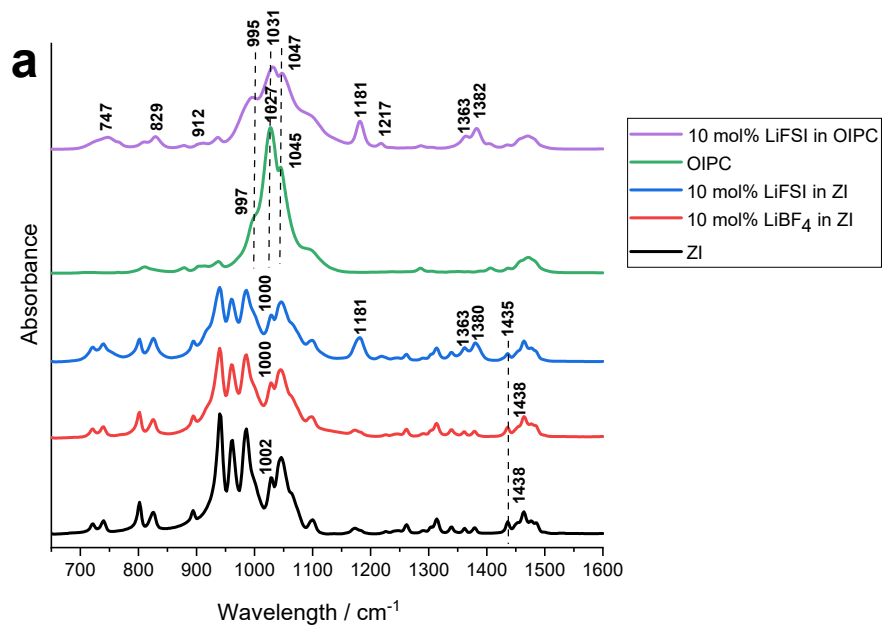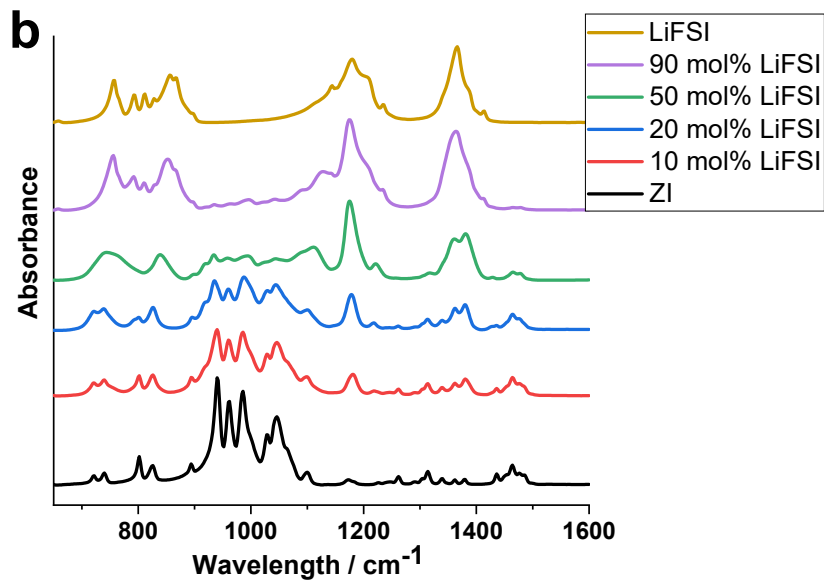

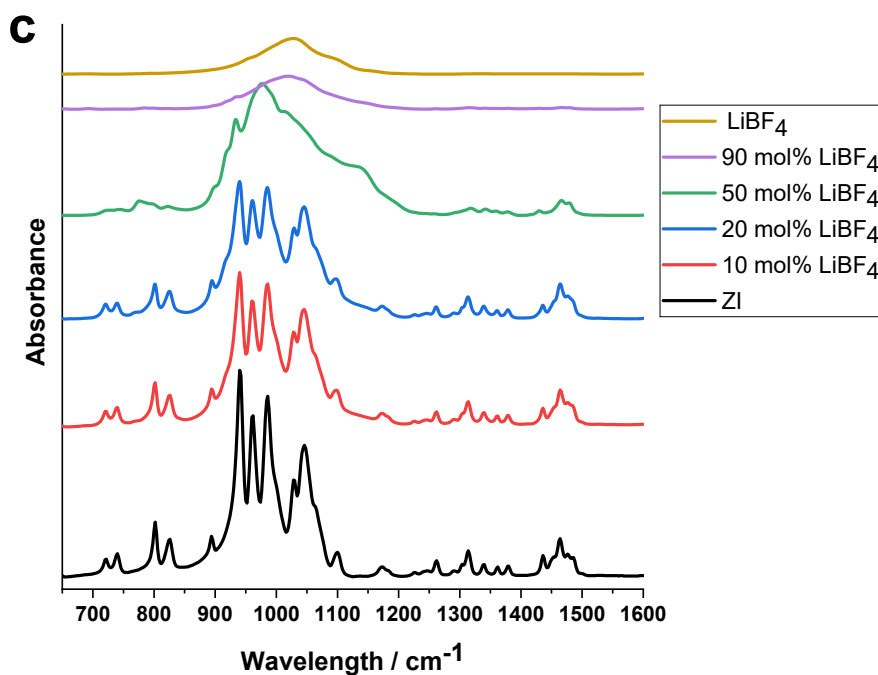

Figure S4. a) Comparison of the room temperature FTIR spectra of ZI, the ZI/10 mol% LiBF<sub>4</sub> and the ZI/10 mol% LiFSI. b) Comparison of the room temperature FTIR spectra of ZI and its mixture with LiFSI. c) Comparison of the room temperature FTIR spectra of ZI and its mixtures with LiBF<sub>4</sub>

In general, the 10 and 20 mol% LiFSI in ZI spectra are relatively sharp and dominated by peaks from the ZI, whereas the 50 and 90% spectra are broader and dominated by the LiFSI signals. The 50% spectra shows the biggest change in peak position and relative peak intensities compared to the neat ZI or LiFSI, as discussed below. However, in both the LiFSI and LiBF<sub>4</sub> spectra many of the bands overlap forming very broad peaks that cannot be accurately deconvoluted.

The FTIR spectra of the ZI/LiFSI electrolytes showed that the peaks do not experience significant changes at 10 and 20 mol% LiFSI, except for a new shoulder appearing at 920 cm<sup>-1</sup> in 10 mol% LiFSI that increases in intensity in the 20 and 50 mol% LiFSI electrolyte. As a shoulder at this position also appears in the ZI/LiBF<sub>4</sub> spectra, this is tentatively concluded to be the result of a new Li-F interaction, where the F can be from the zwitterion or the salt. Some peaks related to the FSI group increased in intensity (1380, 1362, 1218, 1181 cm<sup>-1</sup>) due to the increasing FSI concentration and also overlap with the ZI peaks occurring in those same regions.

In the 50 mol% LiFSI in ZI electrolyte, the position of the alkyl group modes occurring at 1246, 1438, 1476 and 1464 cm<sup>-1</sup> were not affected, but their relative intensity is lower compared to the lower LiFSI content samples. The peaks at 802, 1454 and 1484 cm<sup>-1</sup> are no longer evident in the 50% sample. In addition, the ring modes shifted to lower wavenumber from 1045 cm<sup>-1</sup> (ring breathing) in pure ZI to 1041 cm<sup>-1</sup> in the 50% sample, and from 1028 ((Me-N), (MeBF<sub>3</sub>-N) stretching) to 1024 cm<sup>-1</sup>, with very low intensity. The shifts in the alkyl group and pyrrolidinium ring modes to the lower wavenumbers suggest weaker interactions between ZI and LiFSI, which is consistent with the liquid state of the sample. Similarly, the peaks located at 743, 837, 1147, 1359 and 1378 cm<sup>-1</sup> are assigned to the FSI ion, which all occur at lower wavenumber compared to neat LiFSI.

The spectrum of the 90 mol% LiFSI sample shows the peaks related to the FSI anion at slightly lower wavenumber than in the other samples. The pyrrolidinium ring peaks occur at lower wavenumber with significant lower intensity. Some alkyl peaks disappeared, due to the lower concentration of ZI, and some shifted to lower wavenumber. The observed shifts suggest the presence of a weaker interaction between LiFSI and ZI.

The spectrum of LiBF<sub>4</sub> in ZI (Figure S4c) indicate no significant effect of adding LiBF<sub>4</sub> up to 20 mol%, except for a slight shoulder appearing at 920 cm<sup>-1</sup>. However, at 50 mol% LiBF<sub>4</sub>, all alkyl modes (1045 and 1028 cm<sup>-1</sup>) disappeared and the CH<sub>3</sub> and CH rocking shifts from 1099 in ZI to 1138 cm<sup>-1</sup>. The alkyl modes at 1454 (CH<sub>2</sub> vibration), 1484 (CH<sub>2</sub> ring vibration) and 1246 cm<sup>-1</sup> (CH<sub>3</sub>CN-BF<sub>3</sub> stretching) disappeared, and the other alkyl peaks shifted to lower wavenumbers. The BF<sub>4</sub> peak at 1022 cm<sup>-1</sup> in LiBF<sub>4</sub> shifted to lower wavenumbers of 978 cm<sup>-1</sup>. Similar to the LiFSI mixtures, the shifting peaks to a lower wavenumbers and disappearance of some other peaks is consistent with the disordered, quasi-solid-state structure of 50 mol% LiBF<sub>4</sub> in ZI (as shown in the DSC data in Figure 2a). At the 90% LiBF<sub>4</sub> concentration, the spectra is very broad and essentially the same as for neat LiBF<sub>4</sub>, with no distinguishable peaks from the ZI.

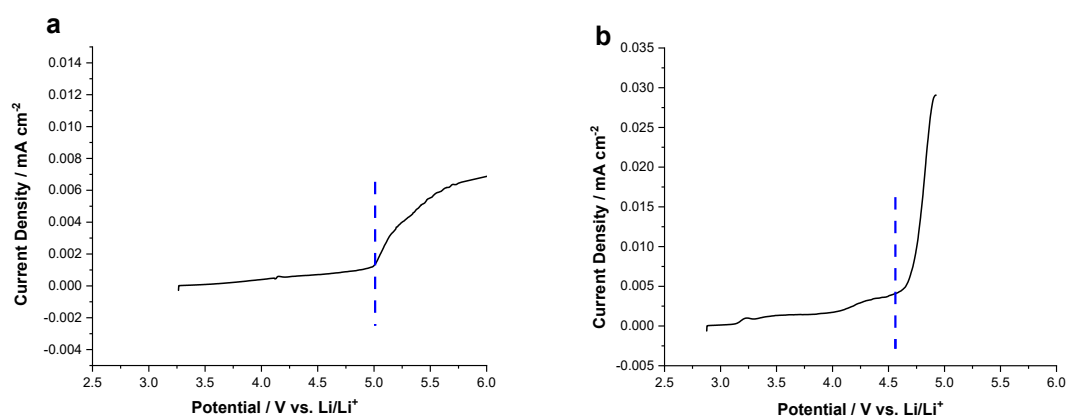

Figure S5. Linear sweep voltammograms obtained for the a) 50 mol% LiFSI b) 90 mol% LiFSI in ZI electrolyte at 50 °C collected at a scan rate of 0.05 mVs<sup>-1</sup> using a stainless-steel working electrode versus a Li metal reference electrode.

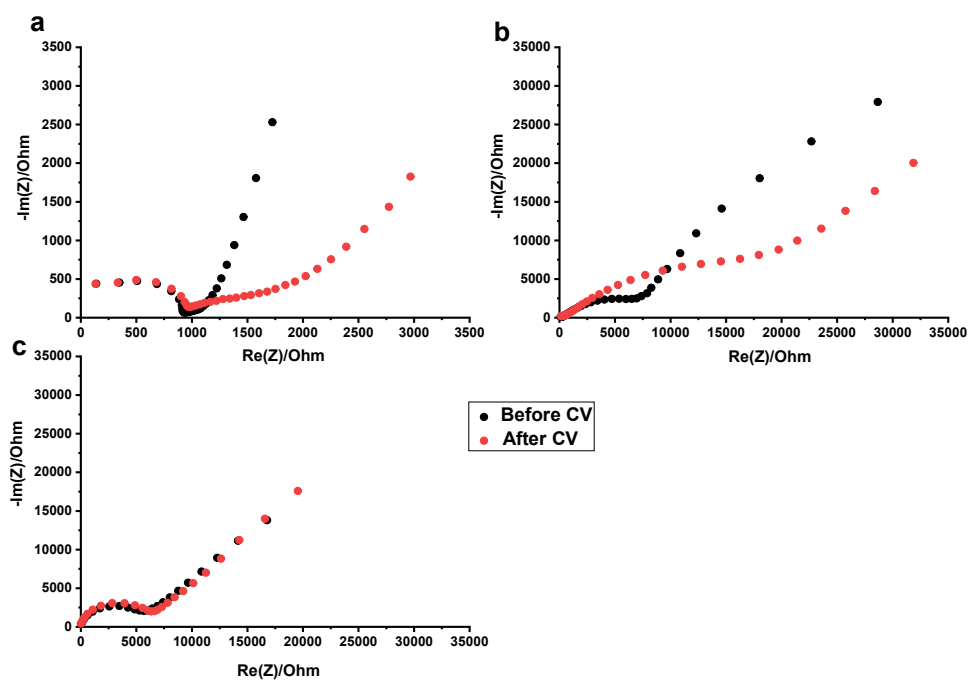

Figure S6. EIS data before and after CV scans of a) 90 mol% LiFSI, b) 90 mol% LiBF<sub>4</sub> and c) 10 mol% LiBF<sub>4</sub> in ZI.

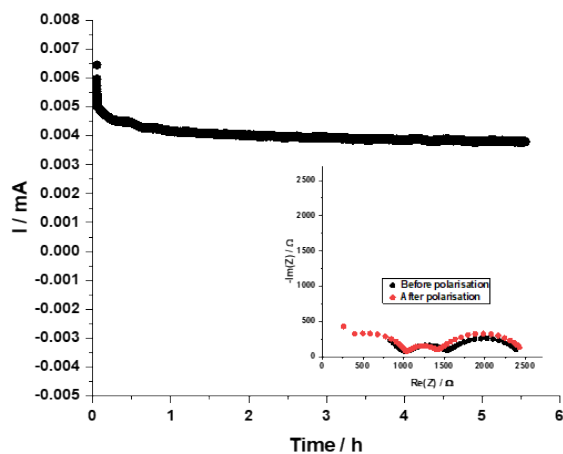

Figure S7. Li ion transference number of the 90 mol% LiFSI in ZI, measured using the Bruce-Vincent method based on constant voltage polarisation at 50 °C. Inset - EIS plots before and after polarisation.

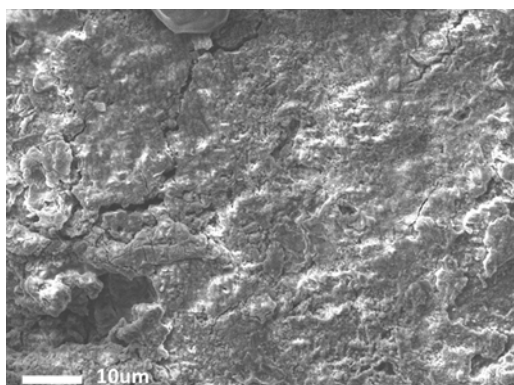

Figure S8. SEM image from the plated side of lithium metal symmetric cells after 1000 h of cycling

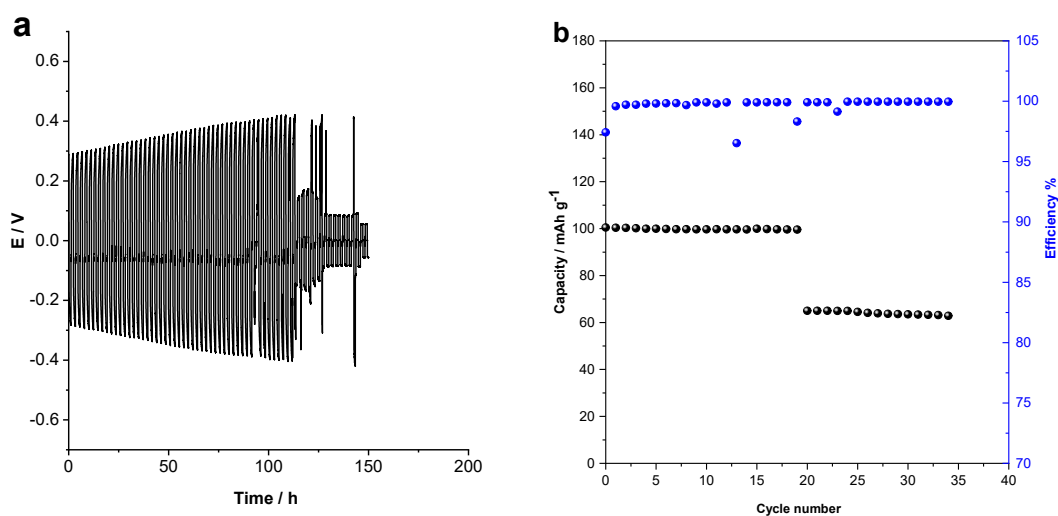

Figure S9. a) Potential ( $E_{we}$ ; V) vs. Time for the Li / 90 mol% LiFSI in [C<sub>2</sub>mpyr][BF<sub>4</sub>] / Li symmetric cell cycling at 0.1 mA cm<sup>-2</sup> at 50 °C with charge and discharge intervals of 1 h. b) discharge capacity vs. cycle number for Li / LFP cells cycled at 50 °C

Table 1. Comparison of the ionic conductivity of the previously reported OIPCs.

| OIPC                                    | Li salt           | mol% | Ionic conductivity / S cm <sup>-1</sup> | Temperature / °C |        | Ref |
|-----------------------------------------|-------------------|------|-----------------------------------------|------------------|--------|-----|
| [C <sub>1</sub> mpyr][BF <sub>4</sub> ] | LiBF <sub>4</sub> | 5    | $5 \times 10^{-7}$                      | 50               | solid  | 1   |
| [P <sub>1i444</sub> FSI]FSI]            | LiFSI             | 4    | $2.6 \times 10^{-4}$                    | 22               | solid  | 2   |
| [C <sub>2</sub> mpyr][FSI]              | LiFSI             | 10   | $10^{-5}$                               | 50               | solid  | 3   |
| [C <sub>2</sub> mpyr][FSI]              | LiFSI             | 50   | $10^{-3}$                               | 50               | liquid | 4   |
| [C <sub>2</sub> mpyr][BF <sub>4</sub> ] | LiBF <sub>4</sub> | 10   | $4.2 \times 10^{-8}$                    | 30               | solid  | 5   |
| [N <sub>1222</sub> ][TFSI]              | LiTFSI            | 90   | $1 \times 10^{-4}$                      | 50               | solid  | 6   |
| [N <sub>1222</sub> ][TFSI]              | LiTFSI            | 10   | $8 \times 10^{-3}$                      | 50               | solid  | 6   |

|                               |       |    |                      |    |        |   |
|-------------------------------|-------|----|----------------------|----|--------|---|
| [N <sub>1222</sub> ][FSI]     | LiFSI | 90 | $2 \times 10^{-4}$   | 50 | solid  | 6 |
| [N <sub>1222</sub> ][FSI]     | LiFSI | 10 | $5 \times 10^{-2}$   | 50 | solid  | 6 |
| [HMG][FSI]                    | LiFSI | 10 | $6 \times 10^{-4}$   | 30 | solid  | 7 |
| [HMG][FSI]                    | LiFSI | 90 | $5 \times 10^{-4}$   | 30 | solid  |   |
| [C <sub>(i3)</sub> mpyr][FSI] | LiFSI | 50 | $1.5 \times 10^{-3}$ | 50 | liquid | 8 |
| [C <sub>3</sub> mpyr][FSI]    | LiFSI | 50 | $3 \times 10^{-3}$   | 50 | liquid |   |
| [C <sub>2</sub> epyr][FSI]    | LiFSI | 50 | $2 \times 10^{-3}$   | 30 | liquid | 9 |
| [C <sub>2</sub> epyr][FSI]    | LiFSI | 90 | $2 \times 10^{-4}$   | 30 | solid  |   |

Table S2. Tentative Assignment of peaks in the IR Spectra of ZI, OIPC and the effect on the peak position upon adding 10 mol% LiBF<sub>4</sub> and LiFSI.

| functional group   | Peak position (cm <sup>-1</sup> )                                          |                                                                            |                                                                            | OIPC [C <sub>2</sub> mpyr][BF <sub>4</sub> ]                              | OIPC/10 mol% LiFSI                                                     | LiFSI                                                                               | LiBF <sub>4</sub> | Band assignment                                                                                                                                                                                                                                                                                                                                                                                                                                                                                         | Ref        |
|--------------------|----------------------------------------------------------------------------|----------------------------------------------------------------------------|----------------------------------------------------------------------------|---------------------------------------------------------------------------|------------------------------------------------------------------------|-------------------------------------------------------------------------------------|-------------------|---------------------------------------------------------------------------------------------------------------------------------------------------------------------------------------------------------------------------------------------------------------------------------------------------------------------------------------------------------------------------------------------------------------------------------------------------------------------------------------------------------|------------|
|                    | ZI (C <sub>1</sub> mpyrBF <sub>3</sub> )                                   | ZI/10 mol% LiBF <sub>4</sub>                                               | ZI/10 mol% LiFSI                                                           |                                                                           |                                                                        |                                                                                     |                   |                                                                                                                                                                                                                                                                                                                                                                                                                                                                                                         |            |
| BF <sub>4</sub>    | 740<br>1289<br>1002                                                        | 740<br>1289<br>1000                                                        | 740<br>1290<br>1000                                                        | -<br>1285<br>996                                                          | -                                                                      | -                                                                                   | 1022              | vBF <sub>4</sub><br>vBF<br>vBF                                                                                                                                                                                                                                                                                                                                                                                                                                                                          | 5          |
| FSI                | -                                                                          | -                                                                          | 1380<br>1362<br>1218<br>1181                                               | -                                                                         | 1382<br>1363<br>1217<br>1181<br>829<br>747                             | 1370<br>1410<br>1210, 1144<br>1178, 1234<br>792, 810, 828, 868<br>756<br>856<br>896 | -                 | v <sub>as</sub> SO <sub>2</sub><br>v <sub>as</sub> SO <sub>2</sub><br>v <sub>s</sub> SO <sub>2</sub><br>v <sub>s</sub> SO <sub>2</sub><br>vS-F<br>v <sub>s</sub> S-N-S<br>v <sub>as</sub> S-N-S<br>v <sub>ip</sub> SF                                                                                                                                                                                                                                                                                   | 10         |
| Pyrrolidinium ring | 1045<br>1028                                                               | 1045<br>1028                                                               | 1045<br>1028                                                               | 1045<br>1027                                                              | 1047<br>1031                                                           |                                                                                     |                   | δ(ring)<br>Ring breathing,<br>v(Me-N), v (MeBF <sub>3</sub> -N)                                                                                                                                                                                                                                                                                                                                                                                                                                         | 11         |
| Alkyl groups       | 1099<br>1438<br>1454<br>1476<br>1484<br>802<br>1246<br>1464<br>-<br>-<br>- | 1098<br>1438<br>1454<br>1476<br>1484<br>802<br>1246<br>1464<br>-<br>-<br>- | 1099<br>1435<br>1454<br>1476<br>1484<br>802<br>1246<br>1464<br>-<br>-<br>- | 1095<br>1436<br>1457<br>1471<br>-<br>810<br>-<br>-<br>1406<br>1387<br>937 | 1095<br>1436<br>1456<br>1471<br>-<br>810<br>-<br>-<br>1407<br>-<br>937 |                                                                                     |                   | δ <sub>rock</sub> (CH <sub>3</sub> )+ δ <sub>rock</sub> (C-H)<br>δ <sub>s</sub> (CH <sub>3</sub> ) <sub>Me</sub><br>δ(CH <sub>2</sub> )<br>δ <sub>as</sub> (CH <sub>3</sub> ) <sub>Me</sub><br>δ(CH <sub>2</sub> ) (ring)<br>γ(CH)<br>vCH <sub>3</sub> CN-BF <sub>3</sub><br>γCH <sub>3</sub> scissoring, out of phase<br>vs(CH <sub>3</sub> ) <sub>Et</sub> + δ <sub>wang</sub> (CH <sub>2</sub> )<br>vas(C-N) <sub>Et</sub> + δ <sub>s</sub> (CH <sub>3</sub> ) <sub>Et</sub><br>v(C-C) <sub>Et</sub> | 5 11<br>12 |

V<sub>as</sub>: asymmetric stretch, V<sub>s</sub>: symmetric stretch; δ<sub>as</sub>: asymmetric deformation, δ<sub>s</sub>: symmetric deformation, γ: out of plane deformation; ip: in-phase; Et: ethyl(-C<sub>2</sub>H<sub>5</sub>); Me: methyl(-CH<sub>3</sub>).



## References

1. L. Jin, P. Howlett, J. Efthimiadis, M. Kar, D. Macfarlane and M. Forsyth, *Journal of Materials Chemistry*, 2011, **21**, 10171-10178.
2. L. Jin, P. C. Howlett, J. M. Pringle, J. Janikowski, M. Armand, D. R. MacFarlane and M. Forsyth, *Energy & Environmental Science*, 2014, **7**, 3352-3361.
3. Y. Zhou, X. Wang, H. Zhu, M. Armand, M. Forsyth, G. W. Greene, J. M. Pringle and P. C. Howlett, *PCCP*, 2017, **19**, 2225-2234.
4. Y. Zhou, X. Wang, H. Zhu, M. Yoshizawa-Fujita, Y. Miyachi, M. Armand, M. Forsyth, G. W. Greene, J. M. Pringle and P. C. Howlett, *ChemSusChem*, 2017, **10**, 3135-3145.
5. N. Iranipour, D. J. Gunzelmann, A. Seeber, J. Vongsivut, C. Doherty, F. Ponzio, L. A. O'Dell, A. F. Hollenkamp, M. Forsyth and P. C. Howlett, *Journal of Materials Chemistry A*, 2015, **3**, 6038-6052.
6. R. Yunis, D. Al-Masri, A. F. Hollenkamp, C. M. Doherty, H. Zhu and J. M. Pringle, *Journal of The Electrochemical Society*, 2020, **167**.
7. K. Biernacka, D. Al-Masri, R. Yunis, H. Zhu, A. F. Hollenkamp and J. M. Pringle, *Electrochimica Acta*, 2020, **357**, 136863.
8. D. Al-Masri, R. Yunis, A. F. Hollenkamp, C. M. Doherty and J. M. Pringle, *Physical Chemistry Chemical Physics*, 2020, **22**, 18102-18113.
9. D. Al-Masri, R. Yunis, H. Zhu, L. Jin, P. Bruce, A. F. Hollenkamp and J. M. Pringle, *Journal of Materials Chemistry A*, 2019, **7**, 25389-25398.
10. X. Li, Z. Zhang, S. Li, K. Yang and L. Yang, *Journal of Materials Chemistry A*, 2017, **5**, 21362-21369.
11. J. Adebahr, P. Johansson, P. Jacobsson, D. R. Macfarlane and M. Forsyth, *Electrochimica acta*, 2003, **48**, 2283-2289.
12. N. P. Wells and J. A. Phillips, *The Journal of Physical Chemistry A*, 2002, **106**, 1518-1523.
